# Supplementary material for: Structure-guided microbial targeting of antistaphylococcal prodrugs
Source: eLife. 2021 Jul 19;10:e66657. doi: 10.7554/eLife.66657 (PMC8318587; doi:10.7554/eLife.66657)
Supplement: Figure 2—source data 1. — Half-maximal inhibitory concentration (IC50) values for POM-HEX against predicted prodrug activating esterases. IC50 values are the result of three independent biological experiments with technical duplicates. p-values calculated as a one-way ANOVA with Dunnett’s correction for multiple comparisons. [file elife-66657-fig2-data1.xlsx]

## Sheet: Sheet1
SAUSA300 gene	Newman Gene	StrID (NARSA)	Pan Gene Symbol	POM-HEX IC50 (µM)	POM-HEX IC50 SD (µM)	Significantly different from wild-type (JE2)?	Adjusted P-Value	Predicted Function	GO Term
Parental Strain		JE2		1.54	0.3958			N/A	Parental Strain
SAUSA300_0742	NWMN_0727	NE145	uvrA	1.455	0.1731	ns	0.9999	excinuclease ABC, A subunit	carboxylic ester hydrolase activity, carboxylesterase activity
SAUSA300_1902	NWMN_1859	NE202		0.7004	0.06583	ns	0.9101	Hypothetical protein	phosphoric diester hydrolase activity
SAUSA300_2173	NWMN_2121	NE223	truA	1.391	0.2856	ns	0.9997	tRNA pseudouridine synthase A	phosphatase
SAUSA300_1285	NWMN_1303	NE293		1.408	0.6404	ns	0.9997	ABC transporter, ATP-binding protein	phosphatase
SAUSA300_2515	NWMN_2477	NE355	gbaA	1.726	0.4768	ns	0.9997	transcriptional regulator, TetR family	carboxylic ester hydrolase activity
SAUSA300_1505	NWMN_1449	NE377	GloB	10.57	3.222	****	<0.0001	hydroxyacylglutathione hydrolase	hydroxyacylglutathione hydrolase
SAUSA300_0142	NWMN_0084	NE478	phnE	1.608	0.8118	ns	0.9999	phosphonate ABC transporter, permease protein	phosphoric diester hydrolase activity
SAUSA300_2564	NWMN_2528	NE503	estA, FrmB	6.28	2.251	****	<0.0001	tributyrin esterase	carboxylic ester hydrolase activity
SAUSA300_2473	NWMN_2434	NE532		1.558	0.5111	ns	>0.9999	Hypothetical Alkaline Phosphatase	phosphatase
SAUSA300_0581	NWMN_0561	NE621		1.624	0.5542	ns	0.9999	Hypothetical protein	phosphatase activity
SAUSA300_0299		NE812		1.639	0.5592	ns	0.9998	Hypothetical protein	phosphatase activity
SAUSA300_1993	NWMN_1947	NE937	fruC	1.666	0.5152	ns	0.9998	PfkB family kinase	phosphatase
SAUSA300_1752	NWMN_1700	NE949	hsdM2	1.73	0.5344	ns	0.9996	type I restriction-modification system, M subunit	phosphoric diester hydrolase activity
SAUSA300_0312	NWMN_0254	NE1039	psuG	1.726	0.5059	ns	0.9997	Hypothetical protein	carboxylic ester hydrolase activity
SAUSA300_0538	NWMN_0515	NE1071	capD	1.538	0.4105	ns	>0.9999	NAD-dependent epimerase/dehydratase family protein	phosphatase activity
SAUSA300_1792	NWMN_1735	NE1173		1.838	0.4015	ns	0.9994	Hypothetical protein	phosphatase activity
SAUSA300_0421	NWMN_0414	NE1225		2.15	0.4836	ns	0.9938	Hypothetical protein	carboxylic ester hydrolase activity, carboxylesterase
SAUSA300_0214	NWMN_0156	NE1238		2.083	0.5366	ns	0.9986	Hypothetical protein	phosphoric diester hydrolase activity
SAUSA300_0690	NWMN_0674	NE1296	saeS	2.073	0.529	ns	0.9986	sensor histidine kinase SaeS	phosphatase
SAUSA300_1639	NWMN_1586	NE1486	phoP	2.18	0.4079	ns	0.9932	alkaline phosphatase synthesis transcriptional regulatory protein	phosphoric diester hydrolase activity
SAUSA300_0840	NWMN_0808	NE1505		2.2	0.5441	ns	0.9927	Hypothetical protein	phosphoric diester hydrolase activity
SAUSA300_1563	NWMN_1507	NE1519	accC	1.754	0.7025	ns	0.9996	acetyl-CoA carboxylase, biotin carboxylase	phosphoric diester hydrolase activity
SAUSA300_2508		NE1547		1.484	0.2325	ns	>0.9999	Hypothetical protein	phosphatase activity
SAUSA300_0996	NWMN_962	NE1610	pdhD	1.225	0.8099	ns	0.9993	dihydrolipoamide dehydrogenase	phosphoric diester hydrolase activity
SAUSA300_2367	NWMN_2320	NE1682	hlgB	1.365	0.1891	ns	0.9997	gamma-hemolysin component B	phosphatase
SAUSA300_0094	NWMN_0036	NE1723		1.344	0.1706	ns	0.9996	Hypothetical protein	phosphoric diester hydrolase activity
