# Supplementary material for: Structure-guided microbial targeting of antistaphylococcal prodrugs
Source: eLife. 2021 Jul 19;10:e66657. doi: 10.7554/eLife.66657 (PMC8318587; doi:10.7554/eLife.66657)
Supplement: Figure 2—source data 2. — Genotype and phenotype of POM-HEX resistant S. aureus. Displayed are the whole-genome sequencing mutations that have been verified. Called mutations that were not observed via confirmatory Sanger sequencing are excluded. IC50 values are the result of three independent biologic replicates with technical duplicates. [file elife-66657-fig2-data2.xlsx]

## Sheet: Sheet1
Gene (Newman)	WT_SAUR	R1	R2	R3	R4	R5	R6	R7	R8	R9	R10	R11	R12	R13	R14	R15	R16	R17	R18	R19	R20	R21	R22	R23	R24	R25
NWMN_1449 (GloB)							c.376G>T p.Val126Leu		c.430T>A p.Phe144Ile	c.433G>A p.Ala145Thr	c.70G>T p.Val24Phe	c.166C>T p.His56Tyr	c.326C>A p.Pro109His	c.70G>T p.Val24Phe	c.70G>T p.Val24Phe	c.289C>T p.Gln97*									c.401C>T p.Pro134Leu
NWMN_2528 (estA, FrmB)				c.40G>C p.Gly14Arg													c.218_219insCATATGCCATGTTAGCA p.Met74fs	c.366G>A p.Met122Ile		c.40G>C p.Gly14Arg		c.366G>A p.Met122Ile		c.356G>A p.Gly119Asp		c.40G>C p.Gly14Arg
NWMN_0144					c.1472G>T p.Arg491Met
NWMN_0240														c.432G>T p.Met144Ile
NWMN_0309				c.23A>C p.Asn8Thr		c.23A>C p.Asn8Thr				c.23A>C p.Asn8Thr	c.23A>C p.Asn8Thr				c.23A>C p.Asn8Thr	c.23A>C p.Asn8Thr		c.23A>C p.Asn8Thr		c.23A>C p.Asn8Thr					c.23A>C p.Asn8Thr	c.23A>C p.Asn8Thr
NWMN_0471 (tilS)																		c.760_765dupTTTAAT p.Phe254_Asn255dup
NWMN_0523 (sdrC)												c.2299A>G p.Asn767Asp
NWMN_0564																	c.230_231delCT p.Ser77fs
NWMN_0954													c.359C>A p.Pro120His
NWMN_1152																									c.1570G>T p.Asp524Tyr
NWMN_1311 (lysA)																									c.1145C>A p.Ser382Tyr
NWMN_1425 (recN)																				c.1130T>C p.Leu377Ser
NWMN_1655			c.17G>A p.Arg6His	c.17G>A p.Arg6His								c.17G>A p.Arg6His		c.17G>A p.Arg6His	c.17G>A p.Arg6His	c.17G>A p.Arg6His		c.17G>A p.Arg6His		c.17G>A p.Arg6His	c.17G>A p.Arg6His	c.17G>A p.Arg6His	c.17G>A p.Arg6His	c.17G>A p.Arg6His
NWMN_1735														c.2754C>A p.Phe918Leu
NWMN_1754																		c.232T>A p.Leu78Ile				c.232T>A p.Leu78Ile
NWMN_2040 (pdp)												c.426G>T p.Leu142Phe
NWMN_2253		c.1412C>T p.Ala471Val	c.1412C>T p.Ala471Val			c.1412C>T p.Ala471Val													c.1412C>T p.Ala471Val
NWMN_2388														c.195G>T p.Gln65His
