# Supplementary material for: Structure-guided microbial targeting of antistaphylococcal prodrugs
Source: eLife. 2021 Jul 19;10:e66657. doi: 10.7554/eLife.66657 (PMC8318587; doi:10.7554/eLife.66657)
Supplement: Figure 2—source data 3. — Half-maximal inhibitory concentration (IC50) values for POM-HEX against transposon mutations in genes identified by whole-genome sequencing. Assays performed in biological triplicate with technical duplicates. p-value calculated as a one-way ANOVA with Dunnett correction for multiple comparisons. [file elife-66657-fig2-data3.xlsx]

## Sheet: Sheet1
SAUSA300 gene	Newman Gene	StrID (NARSA)	Pan Gene Symbol	POM-HEX IC50 (µM)	POM-HEX IC50 SD (µM)	Significantly different from wild-type (JE2)?	Adjusted P-Value	Predicted Function
Parental Strain		JE2		1.54	0.3958			N/A
SAUSA300_1781	NWMN_1723	NE64	hemY	1.425	0.1458	ns	0.9998	protoporphyrinogen oxidase
SAUSA300_0671	NWMN_0654	NE364		1.651	0.7211	ns	0.9998	ABC transporter, ATP-binding protein, MsbA family
SAUSA300_1505	NWMN_1449	NE377	GloB	10.57	3.222	****	<0.0001	hydroxyacylglutathione hydrolase
SAUSA300_1708	NWMN_1655	NE386	rot	1.398	0.1499	ns	0.9997	staphylococcal accessory regulator Rot
SAUSA300_2564	NWMN_2528	NE503	estA, FrmB	6.28	2.251	****	<0.0001	tributyrin esterase
SAUSA300_1452	NWMN_1410	NE520	proC	1.468	0.7491	ns	0.9999	pyrroline-5-carboxylate reductase
SAUSA300_0201	NWMN_0144	NE541		1.598	0.518	ns	>0.9999	peptide ABC transporter, permease protein
SAUSA300_1085	NWMN_1101	NE874		1.641	0.5706	ns	0.9998	conserved hypothetical protein
SAUSA300_2105	NWMN_2057	NE929	mtlF	1.7	0.5543	ns	0.9997	PTS system, mannitol specific IIBC component
SAUSA300_0778	NWMN_0762	NE1051		1.464	0.2537	ns	0.9999	Hypothetical protein
SAUSA300_1290	NWMN_1308	NE1118	dapD	1.69	0.5911	ns	0.9997	tetrahydrodipicolinate acetyltransferase
SAUSA300_0414	NWMN_0407	NE1127	lpl4	1.723	0.6196	ns	0.9997	tandem lipoprotein
SAUSA300_0028		NE1283	tnp	2.099	0.3634	ns	0.9986	Putative Transposase
