# Supplementary material for: Structure-guided microbial targeting of antistaphylococcal prodrugs
Source: eLife. 2021 Jul 19;10:e66657. doi: 10.7554/eLife.66657 (PMC8318587; doi:10.7554/eLife.66657)
Supplement: Figure 2—source data 4. [file elife-66657-fig2-data4.xlsx]

## Sheet: Sheet1
Accession numbers used for the isolates in WhatsGNU analysis.
Isolate	Bioproject	Biosample	WGS	SRA
AD_3_179	PRJNA512846	SAMN10689346	VYMI00000000	SRR8389007
AD_11_548	PRJNA512846	SAMN10689354	VYMN00000000	SRR8389002
AD_14_565	PRJNA512846	SAMN10689355	VYMO00000000	SRR8389003
AD_16_660	PRJNA512846	SAMN10689358	SJAX00000000	SRR8389044
AD_61_868	PRJNA512846	SAMN10689401	VYNS00000000	SRR11016776
AD_85_830	PRJNA512846	SAMN10689428	VYOK00000000	SRR8389056
AD_96_471	PRJNA512846	SAMN10689447	VYOW00000000	SRR8389016
AD_103_347	PRJNA512846	SAMN10689453	VYPC00000000	SRR8389035
AD_113_782	PRJNA512846	SAMN10689463	VYPL00000000	SRR8389099
SSTI_227_44	PRJNA563582	SAMN12642230	VUGB00000000	SRR11016228
SSTI_228_42	PRJNA563582	SAMN12642226	VUGF00000000	SRR11016232
SSTI_231_2	PRJNA563582	SAMN12642218	VUGN00000000	SRR11016241
SSTI_233_51	PRJNA563582	SAMN12642215	VUGQ00000000	SRR11016244
SSTI_235	PRJNA563582	SAMN12642210	VUGV00000000	SRR11016250
SSTI_241_9	PRJNA563582	SAMN12642203	VUHC00000000	SRR11016198
SSTI_247_75	PRJNA563582	SAMN12642193	VUHM00000000	SRR11016209
SSTI_258_57	PRJNA563582	SAMN12642177	VUIB00000000	SRR11016226
SSTI_290	PRJNA563582	SAMN12642174	VUIE00000000	SRR11016283
