# Supplementary material for: Structure-guided microbial targeting of antistaphylococcal prodrugs
Source: eLife. 2021 Jul 19;10:e66657. doi: 10.7554/eLife.66657 (PMC8318587; doi:10.7554/eLife.66657)
Supplement: Figure 3—source data 1. — Displayed are the results of three independent biological replicates in technical duplicate. (2) Michaelis–Menten parameters for SaGloB. Displayed are the results of three independent biological replicates in technical duplicate. [file elife-66657-fig3-data1.xlsx]

## Sheet: Figure 3 source data 1
SaFrmB	Vmax (pmol*min-1*μg protein-1)		Km (μM)		Vmax/Km (pmol*min-1*mg FrmB-1µM-1)		kcat (10-3 s-1)		kcat/Km (M-1 s-1)		kcat/kuncat (103)		((kcat/Km)/kuncat) (109 M-1)		((Vmax/Km)/kuncat) (1012 pmol*mg FrmB-1µM-1)
Substrate	Value	SEM	Value	SEM	Value	SEM	Value	SEM	Value	SEM	Value	SEM	Value	SEM	Value	SEM
1C	0.148606	0.0594763	30.3767	29.5214	4.89212	2.01468	0.027976	0.0111968	0.920971	0.379276	7.98935	16.4497	0.263009	0.557212	23.2847	49.3311
2C	0.0636837	0.0273863	26.5198	28.8628	2.40136	0.948845	0.0119888	0.00515564	0.452071	0.178626	4.73867	5.37606	0.178684	0.186263	15.8192	16.4902
3C			>50		10.19	0.6405			1.91833	0.120578			0.316382	0.0495866	28.0099	4.38999
6C			>50		1.842	0.137			0.346768	0.0257911			0.0666007	0.0444163	5.89629	3.93226
7C			>50		1.013	0.07867			0.190703	0.0148101			0.0216626	0.0132707	1.91783	1.17488
8C			>50		0.3139	0.01153			0.0590936	0.00217059			0.0891754	0.00337573	7.89487	0.29886
9C			>50		0.1599	0.00942			0.0301021	0.00177337			0.0176725	0.00187857	1.56458	0.166314
10C			>50		0.2329	0.02895			0.0438448	0.00545001			0.0279355	0.0193836	2.47319	1.71606
11C			>50		0.6823	0.06196			0.128447	0.0116643			0.253681	0.0137281	22.4589	1.21538
1O	5.98435	0.677157	30.3083	8.33349	197.449	81.2573	1.12659	0.127479	37.1709	15.2972	1.33852	0.313987	0.0441635	0.0376778	3.90988	3.33569
2O	2.04404	0.328266	13.8756	6.76108	147.312	48.5523	0.384804	0.061798	27.7325	9.14025	1.07788	0.488908	0.0776819	0.0723121	6.87733	6.40193
3O	0.62066	0.190513	9.94973	10.0559	62.3796	18.9454	0.116843	0.0358653	11.7433	3.56658	0.911293	0.656272	0.0915897	0.0652623	8.10862	5.7778
4O	0.183403	0.0382509	29.9627	15.2385	6.12103	2.51014	0.0345267	0.00720097	1.15232	0.47255	1.39973	1.70303	0.0467157	0.111758	4.13583	9.89414
5O			>50		1.542	0.1044			0.290291	0.0196539			0.0452284	0.0210165	4.00415	1.86063
6O	0.597265	0.090513	9.16722	4.66179	65.1523	19.4159	0.112439	0.0170396	12.2653	3.65516	1.49057	0.482708	0.162598	0.103546	14.3951	9.1671
7O	2.57423	0.956337	107.22	64.8041	24.0089	14.7574	0.484614	0.180036	4.51982	2.77816	3.31133	5.68535	0.0308836	0.0877314	2.73419	7.76703
8O	0.163277	0.0305849	18.3024	9.65968	8.92111	3.16625	0.0307379	0.0057578	1.67945	0.596065	1.38459	0.465841	0.075651	0.0482253	6.69753	4.26948
9O			>50		7.236	0.3137			1.36222	0.0590559			0.052494	0.00759724	4.6474	0.672599
10O	0.163266	0.0526512	74.1832	43.6388	2.20085	1.20652	0.0307358	0.00991191	0.414322	0.227135	4.97477	10.259	0.0670605	0.235089	5.937	20.8129
11O			>50		79.14	2.729			14.8986	0.513751			0.0165173	0.00580947	1.46231	0.514323
12O			>50		3.177	0.2568			0.598089	0.0483441			0.00493337	0.00114695	0.436761	0.101542
1S			>50		12.51	0.5968			2.35508	0.112351			0.012098	0.00260273	1.07106	0.230425
2S			>50		168.7	13.69			31.7588	2.57722			0.0266247	0.0290174	2.35713	2.56896
3S			>50		7.792	0.1918			1.46689	0.0361075			0.00821788	0.000911039	0.727544	0.080656
4S	0.504615	0.147349	52.6743	31.3403	9.57991	4.70157	0.0949969	0.0277393	1.80348	0.885099	1.40182	0.698723	0.026613	0.0222947	2.3561	1.97379
5S	0.0295476	0.00299115	11.1213	3.60995	2.65684	0.828584	0.00556252	0.000563101	0.500166	0.155986	0.909652	0.18656	0.0817934	0.0516795	7.24133	4.57529
6S	0.628803	0.168628	36.2534	22.3385	17.3446	7.54879	0.118376	0.0317453	3.26523	1.4211	2.44326	1.41509	0.0673939	0.0633479	5.96651	5.60831
7S			>50		1.552	0.1246			0.292173	0.0234567			0.0212696	0.00318705	1.88304	0.282156
8S			>50		2.204	0.2439			0.414916	0.0459156			0.0244308	0.00580843	2.1629	0.514231
9S			>50		5.382	0.4834			1.01319	0.091003			0.0131073	0.0435074	1.16041	3.85179
11S			>50		10.83	1.093			2.03881	0.205764			0.0439873	0.010525	3.89428	0.931799
12S			>50		1.016	0.06746			0.191268	0.0126997			0.0213429	0.00132634	1.88953	0.117424

## Sheet: Figure 3 source data 2
SaGloB	Vmax (pmol*min-1*μg protein-1)		Km (μM)		Vmax/Km (pmol*min-1*mg GloB-1µM-1)		kcat (10-3 s-1)		kcat/Km (M-1 s-1)		kcat/kuncat (103)		((kcat/Km)/kuncat) (109 M-1)		((Vmax/Km)/kuncat) (1012pmol*mg GloB-1µM-1)
Substrate	Value	SEM	Value	SEM	Value	SEM	Value	SEM	Value	SEM	Value	SEM	Value	SEM	Value	SEM
1C	0.497491	0.0741952	6.22635	3.38757	79.901	21.9022	0.0743904	0.0110945	11.9477	3.27505	21.2443	16.2994	3.41199	4.81153	380.3	536.292
2C	0.291623	0.0508913	18.3313	9.00946	15.9085	5.64865	0.0436067	0.00760982	2.37881	0.844648	17.2358	7.93517	0.94024	0.88076	104.799	98.1692
3C			>50 μM		10.38	0.9888			1.55213	0.147856			0.255986	0.0608045	28.5322	6.77724
6C	0.443538	0.129718	48.0015	29.4798	9.2401	4.40022	0.0663227	0.0193968	1.38168	0.657969	12.738	33.4044	0.265368	1.13313	29.5778	126.298
7C			>50 μM		6.428	0.3088			0.961185	0.0461752			0.109184	0.0413756	12.1696	4.61171
8C	0.350567	0.113241	84.886	47.9263	4.12986	2.36281	0.0524206	0.016933	0.617541	0.353313	79.1056	26.3344	0.931904	0.549477	103.87	61.2445
9C			>50 μM		0.2779	0.01242			0.0415546	0.00185717			0.0243961	0.00196735	2.71918	0.21928
10C			>50 μM		0.7895	0.07378			0.118055	0.0110324			0.075218	0.0392379	8.38377	4.37344
11C			>50 μM		0.8842	0.03662			0.132215	0.00547582			0.261123	0.00644467	29.1047	0.718321
1O	217.251	41.5158	73.4846	25.693	2960	1620	32.4858	6.20789	442.076	241.618	38.5969	15.2904	0.525238	0.595117	58.6139	66.5025
2O	46.3767	9.95192	42.0379	19.7716	1103.21	503.343	6.93475	1.48812	164.964	75.2654	19.4251	11.7731	0.462084	0.595454	51.5037	66.3691
3O	4.2109	0.515212	8.41339	3.52183	500.	146.291	0.629659	0.0770402	74.8402	21.8751	4.9109	1.4097	0.583701	0.400276	64.9942	44.6146
4O	1.38938	0.14641	18.0079	5.37075	77.1538	27.2606	0.207755	0.0218928	11.5369	4.0763	8.42248	5.17764	0.467711	0.964045	52.1309	107.452
5O	0.730615	0.150871	21.2022	11.8345	34.4593	12.7483	0.109249	0.0225598	5.15273	1.90627	17.0215	24.1238	0.802814	2.03843	89.4814	227.203
6O	2.90653	0.256721	12.035	3.34326	241.506	76.7875	0.434616	0.0383877	36.1127	11.4821	5.7616	1.08747	0.478736	0.325272	53.3598	36.2547
7O	23.0993	4.49509	20.5379	10.9019	1130	412.321	3.45406	0.672155	168.18	61.6548	23.6014	21.2259	1.14916	1.94699	128.687	217.011
8O	1.00931	0.148674	15.5493	6.74547	64.9101	22.0406	0.150923	0.0222314	9.70607	3.29575	6.79833	1.79866	0.43721	0.266647	48.7313	29.7203
9O	2.53905	0.833325	55.5229	36.5011	45.7299	22.8302	0.379667	0.124608	6.83803	3.41381	14.6307	16.0302	0.263508	0.43917	29.3705	48.9497
10O			>50 μM		2.955	0.2234			0.441864	0.0334052			0.0715183	0.034575	7.97141	3.85372
11O			>50 μM		247.9	21.85			37.0687	3.26725			0.0410961	0.0369459	4.58056	4.11798
12O	1.03995	0.189616	36.9093	15.3752	28.1758	12.3326	0.155504	0.0283534	4.21315	1.8441	1.28269	0.672678	0.0347524	0.0437509	3.87349	4.87646
1S	14.8592	3.92125	32.49	20.3899	457.346	192.313	2.22191	0.586349	68.3874	28.7568	11.4139	13.5834	0.351305	0.666181	39.1564	74.2523
2S			>50 μM		422.3	39.5			63.1469	5.90647			0.0529386	0.0665018	5.90052	7.41227
3S			>50 μM		30.97	2.339			4.63097	0.349753			0.0259438	0.00882471	2.89169	0.9836
4S			>50 μM		125.8	15.2			18.811	2.27287			0.277585	0.0572511	30.9395	6.38119
5S	0.177906	0.049467	31.6589	21.1036	5.61947	2.34401	0.0266024	0.00739685	0.840284	0.350502	4.35036	2.45064	0.137414	0.116124	15.3161	12.9432
6S	4.1925	1.17398	65.7694	34.9193	63.7455	33.6197	0.626909	0.175546	9.53192	5.02719	12.9393	7.82522	0.196737	0.224095	21.9283	24.9775
7S	0.721786	0.149826	49.5352	21.3732	14.5712	7.01	0.107929	0.0224037	2.17884	1.04821	7.85702	3.04398	0.158615	0.14242	17.6792	15.8741
8S	1.02318	0.404035	79.826	56.1741	12.8176	7.19255	0.152996	0.0604157	1.91662	1.07551	9.00863	7.64273	0.112853	0.136054	12.5786	15.1646
9S			>50 μM		11.12	0.8578			1.66278	0.128268			0.0215108	0.0613232	2.39759	6.83506
11S			>50 μM		20.52	2.866			3.06837	0.428556			0.0662001	0.021921	7.37864	2.44331
12S			>50 μM		1.858	0.03469			0.277828	0.00518723			0.0310019	0.000541747	3.45546	0.0603829
