# Supplementary material for: Structure-guided microbial targeting of antistaphylococcal prodrugs
Source: eLife. 2021 Jul 19;10:e66657. doi: 10.7554/eLife.66657 (PMC8318587; doi:10.7554/eLife.66657)
Supplement: Figure 4—source data 1. [file elife-66657-fig4-data1.xlsx]

## Sheet: Sheet1
Figure 4 source data 1 Summary of crystallographic data collection and refinement statistics.
Data Collection		SaFrmB
	Space Group	C2
	Cell dimensions	a= 128.3Å, b= 80.5Å
		c=66.7Å, β=113.8o
	Wavelength (Å)	1
	Resolution (Å) (highest shell)	36.8-1.60 (1.63-1.60)
	Reflections (total/unique)	145,907 / 78193
	Completeness (highest shell)	96.4% (99.1%)
	<I/σ> (highest shell)	27.1 (4.1)
	Rsym (highest shell)	6.6% (57.3%)
Refinement
	Rcryst / Rfree	0.156 / 0.179
	No. of protein atoms	4164
	No. of waters	496
	No. of ligand atoms	3
	R.m.s.d., bond lengths (Å)	0.009
	R.m.s.d., bond angles (o)	1.34
	Avg. B-factor (Å2): protein, water, ligand	25.8, 37.6, 15.9
	Stereochemistry: most favored, allowed, disallowed	98.4, 1.6, 0 %
