# Supplementary material for: Structure-guided microbial targeting of antistaphylococcal prodrugs
Source: eLife. 2021 Jul 19;10:e66657. doi: 10.7554/eLife.66657 (PMC8318587; doi:10.7554/eLife.66657)
Supplement: Figure 5—source data 1. [file elife-66657-fig5-data1.xlsx]

## Sheet: Sheet1
Figure 5 source data 1 Summary of crystallographic data collection and refinement statistics.
Data Collection		SaGloB (SeMet)
	Space Group	P 1 21 1
	Cell dimensions	a= 93.7Å, b= 44.8Å
		c=105.0Å, β=96.7o
	Wavelength (Å)	1
	Resolution (Å) (highest shell)	48 - 1.71 (1.74 - 1.71)
	Reflections (total/unique)	536,305 / 97,666
	Completeness (highest shell)	96.1 % (88.8 %)
	<I/σ> (highest shell)	21.3 (1.4)
	Rsym (highest shell)	10.4% (54.8%)
Refinement
	Rcryst / Rfree	0.225 / 0.251
	No. of protein atoms	6323
	No. of waters	431
	No. of ligand atoms	28
	R.m.s.d., bond lengths (Å)	0.007
	R.m.s.d., bond angles (o)	1.21
	Avg. B-factor (Å2): protein, water, ligand	39.6, 44.9, 47.5
	Stereochemistry: most favored, allowed, disallowed	96.2, 3.8, 0 %
