# Supplementary material for: Structure-guided microbial targeting of antistaphylococcal prodrugs
Source: eLife. 2021 Jul 19;10:e66657. doi: 10.7554/eLife.66657 (PMC8318587; doi:10.7554/eLife.66657)
Supplement: Figure 6—source data 1. — Displayed are the results of three independent biological replicates in technical duplicate. (2) Michaelis–Menten parameters for mouse sera. Displayed are the results of three independent biological replicates in technical duplicate. [file elife-66657-fig6-data1.xlsx]

## Sheet: Figure 6 source data 1
Human Sera	Vmax (pmol*min-1*mg sera-1)		Km (μM)		Vmax/Km (pmol*min-1*mg sera-1µM-1)		((Vmax/Km)/kuncat) (1012 pmol*mg sera-1µM-1)
Substrate	Value	SEM	Value	SEM	Value	SEM	Value	SEM
1C	1.05843	0.147626	36.1726	11.4906	0.0292604	0.0128475	0.139269	0.314582
2C	0.356197	0.191408	71.5421	70.5874	0.00497884	0.00271163	0.0327987	0.0471261
3C			>50		0.00161035	0.000220634	0.00442647	0.00151223
6C			>50		0.00121445	0.000132787	0.00388748	0.00381134
7C	0.441289	0.0285179	64.1753	8.02619	0.0068763	0.00355309	0.0130184	0.0530628
8C			>50		0.000791158	6.24559e-05	0.0198983	0.00161887
9C			>50		0.000580582	2.568e-05	0.00568084	0.00045339
10C			>50		0.000482784	4.2265e-05	0.00512673	0.00250533
11C			>50		0.000710801	2.66537e-05	0.023397	0.000522827
1O	68.6247	25.6432	64.0896	45.7776	1.07076	0.56017	0.0212032	0.0229955
2O	43.8483	10.5327	40.3855	21.5429	1.08574	0.488919	0.0506883	0.0644672
3O	11.7232	2.81471	22.1677	14.2065	0.528841	0.198129	0.0687431	0.0604235
4O	5.88111	1.89759	44.4551	30.9032	0.132293	0.0614044	0.0893874	0.242036
5O	2.2473	0.478312	35.404	17.4255	0.0634759	0.0274491	0.16483	0.489201
6O	11.7351	3.82398	54.6349	35.8714	0.214791	0.106602	0.0474571	0.0503317
7O	5.73428	1.16033	30.2622	14.8612	0.189487	0.0780779	0.0215792	0.0410936
8O	3.92663	0.705476	27.6656	12.4286	0.141932	0.0567625	0.106555	0.0765406
9O	4.34567	1.18481	111.745	48.9291	0.0388892	0.0242148	0.024977	0.0519186
10O	1.45727	0.383596	63.2934	31.8208	0.0230241	0.0120549	0.0621098	0.207951
11O			>50		0.121873	0.00839201	0.0022519	0.00158161
12O	4.00374	0.677864	42.2367	15.6585	0.094793	0.0432904	0.0130318	0.0171176
1S	30.4947	9.89846	71.8057	42.9651	0.424683	0.230384	0.0363599	0.0889512
2S			>50		0.315008	0.0251557	0.0044014	0.00472053
3S	8.79855	2.92205	74.2668	45.031	0.118472	0.0648896	0.0110618	0.0272875
4S	3.81452	0.388789	27.9122	7.08478	0.136661	0.0548766	0.0336108	0.023038
5S	0.689541	0.24621	31.0339	26.6689	0.022219	0.00923211	0.0605588	0.050978
6S			>50		0.0257442	0.00245458	0.00885593	0.00182361
7S	1.59576	0.425116	30.2043	19.6626	0.052832	0.0216205	0.064101	0.0489594
8S			>50		0.0140384	0.000717863	0.0137766	0.00151352
9S			>50		0.0246956	0.00207259	0.00532462	0.0165147
11S			>50		0.0189604	0.00174731	0.00681784	0.00148961
12S			>50		0.00503756	0.000356738	0.00936872	0.000620954

## Sheet: Figure 6 source data 2
Mouse Sera	Vmax (pmol*min-1*mg sera-1)		Km (μM)		Vmax/Km (pmol*min-1*mg sera-1µM-1)		((Vmax/Km)/kuncat) (1012 pmol*mg sera-1µM-1)
Substrate	Value	SEM	Value	SEM	Value	SEM	Value	SEM
1C			>50		4.55872	0.506328	21.6979	12.3978
2C			>50		1.62248	0.32708	10.6883	5.68439
3C			>50		0.519248	0.0188496	1.42729	0.129195
6C	17.5779	9.41823	53.5459	58.1058	0.328278	0.162088	1.05083	4.65234
7C			>50		2.03864	0.27064	3.8596	4.04182
8C			>50		1.3532	0.129186	34.0342	3.34853
9C	3.175	0.66	12.255	7.97277	0.25905	0.0828145	2.53473	1.46212
10C			>50		0.929832	0.0799544	9.87397	4.73944
11C			>50		0.283696	0.00940984	9.33825	0.184579
1O			>50		14.008	0.829056	0.277386	0.0340335
2O			>50		15.8984	1.12363	0.742222	0.148158
3O			>50		56.9973	43.1687	7.40898	13.1652
4O			>50		6.76464	0.207808	4.5707	0.819109
5O			>50		20.275	12.0449	52.6486	214.667
6O	437.08	135.313	11.4724	8.64893	38.0982	15.645	8.41762	7.38671
7O	928.9	102.6	25.9279	7.29693	35.8285	14.0611	4.08023	7.40059
8O			>50		15.6944	0.388416	11.7826	0.523754
9O			>50		6.69392	0.165648	4.29924	0.355163
10O			>50		2.93216	0.136816	7.90979	2.36012
11O			>50		3.23952	0.160344	0.0598581	0.0302194
12O			>50		11.9231	0.382432	1.63914	0.151219
1S			>50		14.2392	1.39264	1.21911	0.537699
2S			>50		5.06736	0.211616	0.0708029	0.0397103
3S			>50		9.46696	0.761328	0.883937	0.320155
4S			>50		24.2488	2.5704	5.9638	1.07909
5S			>50		1.93256	0.128928	5.26727	0.711916
6S			>50		12.0877	0.551616	4.15813	0.409819
7S			>50		11.9	1.1303	14.4382	2.55955
8S			>50		5.16664	0.433704	5.0703	0.914409
9S			>50		1.29132	0.11118	0.278422	0.885896
11S			>50		1.97064	0.103074	0.708608	0.0878725
12S			>50		5.74464	0.529856	10.6837	0.922291
