# Supplementary material for: Structure-guided microbial targeting of antistaphylococcal prodrugs
Source: eLife journal article supplement (doi:10.7554/elife.66657), 2021-07-19
Supplement: supp [file elife_poa_e66657_Figure_2_source_data_1.xlsx]

## Sheet: Figure 2 source data 1
SAUSA300 gene	Newman Gene	StrID (NARSA)	Pan Gene Symbol	POM-HEX IC50 (µM)	POM-HEX IC50 SD (µM)	Significantly different from wild-type (JE2)?	Adjusted P-Value	Predicted Function	GO Term
Parental Strain		JE2		1.54	0.3958			N/A	Parental Strain
SAUSA300_0742	NWMN_0727	NE145	uvrA	1.455	0.1731	ns	0.9999	excinuclease ABC, A subunit	carboxylic ester hydrolase activity, carboxylesterase activity
SAUSA300_1902	NWMN_1859	NE202		0.7004	0.06583	ns	0.9101	Hypothetical protein	phosphoric diester hydrolase activity
SAUSA300_2173	NWMN_2121	NE223	truA	1.391	0.2856	ns	0.9997	tRNA pseudouridine synthase A	phosphatase
SAUSA300_1285	NWMN_1303	NE293		1.408	0.6404	ns	0.9997	ABC transporter, ATP-binding protein	phosphatase
SAUSA300_2515	NWMN_2477	NE355	gbaA	1.726	0.4768	ns	0.9997	transcriptional regulator, TetR family	carboxylic ester hydrolase activity
SAUSA300_1505	NWMN_1449	NE377	GloB	10.57	3.222	****	<0.0001	hydroxyacylglutathione hydrolase	hydroxyacylglutathione hydrolase
SAUSA300_0142	NWMN_0084	NE478	phnE	1.608	0.8118	ns	0.9999	phosphonate ABC transporter, permease protein	phosphoric diester hydrolase activity
SAUSA300_2564	NWMN_2528	NE503	estA, FrmB	6.28	2.251	****	<0.0001	tributyrin esterase	carboxylic ester hydrolase activity
SAUSA300_2473	NWMN_2434	NE532		1.558	0.5111	ns	>0.9999	Hypothetical Alkaline Phosphatase	phosphatase
SAUSA300_0581	NWMN_0561	NE621		1.624	0.5542	ns	0.9999	Hypothetical protein	phosphatase activity
SAUSA300_0299		NE812		1.639	0.5592	ns	0.9998	Hypothetical protein	phosphatase activity
SAUSA300_1993	NWMN_1947	NE937	fruC	1.666	0.5152	ns	0.9998	PfkB family kinase	phosphatase
SAUSA300_1752	NWMN_1700	NE949	hsdM2	1.73	0.5344	ns	0.9996	type I restriction-modification system, M subunit	phosphoric diester hydrolase activity
SAUSA300_0312	NWMN_0254	NE1039	psuG	1.726	0.5059	ns	0.9997	Hypothetical protein	carboxylic ester hydrolase activity
SAUSA300_0538	NWMN_0515	NE1071	capD	1.538	0.4105	ns	>0.9999	NAD-dependent epimerase/dehydratase family protein	phosphatase activity
SAUSA300_1792	NWMN_1735	NE1173		1.838	0.4015	ns	0.9994	Hypothetical protein	phosphatase activity
SAUSA300_0421	NWMN_0414	NE1225		2.15	0.4836	ns	0.9938	Hypothetical protein	carboxylic ester hydrolase activity, carboxylesterase
SAUSA300_0214	NWMN_0156	NE1238		2.083	0.5366	ns	0.9986	Hypothetical protein	phosphoric diester hydrolase activity
SAUSA300_0690	NWMN_0674	NE1296	saeS	2.073	0.529	ns	0.9986	sensor histidine kinase SaeS	phosphatase
SAUSA300_1639	NWMN_1586	NE1486	phoP	2.18	0.4079	ns	0.9932	alkaline phosphatase synthesis transcriptional regulatory protein	phosphoric diester hydrolase activity
SAUSA300_0840	NWMN_0808	NE1505		2.2	0.5441	ns	0.9927	Hypothetical protein	phosphoric diester hydrolase activity
SAUSA300_1563	NWMN_1507	NE1519	accC	1.754	0.7025	ns	0.9996	acetyl-CoA carboxylase, biotin carboxylase	phosphoric diester hydrolase activity
SAUSA300_2508		NE1547		1.484	0.2325	ns	>0.9999	Hypothetical protein	phosphatase activity
SAUSA300_0996	NWMN_962	NE1610	pdhD	1.225	0.8099	ns	0.9993	dihydrolipoamide dehydrogenase	phosphoric diester hydrolase activity
SAUSA300_2367	NWMN_2320	NE1682	hlgB	1.365	0.1891	ns	0.9997	gamma-hemolysin component B	phosphatase
SAUSA300_0094	NWMN_0036	NE1723		1.344	0.1706	ns	0.9996	Hypothetical protein	phosphoric diester hydrolase activity

## Sheet: Figure 2 source data 2
Gene (Newman)	WT_SAUR	R1	R2	R3	R4	R5	R6	R7	R8	R9	R10	R11	R12	R13	R14	R15	R16	R17	R18	R19	R20	R21	R22	R23	R24	R25
NWMN_1449 (GloB)							c.376G>T p.Val126Leu		c.430T>A p.Phe144Ile	c.433G>A p.Ala145Thr	c.70G>T p.Val24Phe	c.166C>T p.His56Tyr	c.326C>A p.Pro109His	c.70G>T p.Val24Phe	c.70G>T p.Val24Phe	c.289C>T p.Gln97*									c.401C>T p.Pro134Leu
NWMN_2528 (estA, FrmB)				c.40G>C p.Gly14Arg													c.218_219insCATATGCCATGTTAGCA p.Met74fs	c.366G>A p.Met122Ile		c.40G>C p.Gly14Arg		c.366G>A p.Met122Ile		c.356G>A p.Gly119Asp		c.40G>C p.Gly14Arg
NWMN_0144					c.1472G>T p.Arg491Met
NWMN_0240														c.432G>T p.Met144Ile
NWMN_0309				c.23A>C p.Asn8Thr		c.23A>C p.Asn8Thr				c.23A>C p.Asn8Thr	c.23A>C p.Asn8Thr				c.23A>C p.Asn8Thr	c.23A>C p.Asn8Thr		c.23A>C p.Asn8Thr		c.23A>C p.Asn8Thr					c.23A>C p.Asn8Thr	c.23A>C p.Asn8Thr
NWMN_0471 (tilS)																		c.760_765dupTTTAAT p.Phe254_Asn255dup
NWMN_0523 (sdrC)												c.2299A>G p.Asn767Asp
NWMN_0564																	c.230_231delCT p.Ser77fs
NWMN_0954													c.359C>A p.Pro120His
NWMN_1152																									c.1570G>T p.Asp524Tyr
NWMN_1311 (lysA)																									c.1145C>A p.Ser382Tyr
NWMN_1425 (recN)																				c.1130T>C p.Leu377Ser
NWMN_1655			c.17G>A p.Arg6His	c.17G>A p.Arg6His								c.17G>A p.Arg6His		c.17G>A p.Arg6His	c.17G>A p.Arg6His	c.17G>A p.Arg6His		c.17G>A p.Arg6His		c.17G>A p.Arg6His	c.17G>A p.Arg6His	c.17G>A p.Arg6His	c.17G>A p.Arg6His	c.17G>A p.Arg6His
NWMN_1735														c.2754C>A p.Phe918Leu
NWMN_1754																		c.232T>A p.Leu78Ile				c.232T>A p.Leu78Ile
NWMN_2040 (pdp)												c.426G>T p.Leu142Phe
NWMN_2253		c.1412C>T p.Ala471Val	c.1412C>T p.Ala471Val			c.1412C>T p.Ala471Val													c.1412C>T p.Ala471Val
NWMN_2388														c.195G>T p.Gln65His
POM-HEX IC50 (µM)	1.921	6.337	5.932	9.561	10.54	3.752	11.09	10.71	16.96	17.71	8.353	31.66	11.47	6.746	4.033	5.61	5.559	3.882	2.788	5.678	3.847	3.923	4.568	3.794	8.396	3.519
Std. Deviation	1.111	0.8778	0.7325	0.4846	6.261	2.594	4.974	6.602	7.264	10.65	3.673	32.94	4.009	2.199	1.276	5.394	2.96	1.153	0.538	2.073	1.061	1.087	4.194	0.903	1.049	0.112

## Sheet: Figure 2 source data 3
SAUSA300 gene	Newman Gene	StrID (NARSA)	Pan Gene Symbol	POM-HEX IC50 (µM)	POM-HEX IC50 SD (µM)	Significantly different from wild-type (JE2)?	Adjusted P-Value	Predicted Function
Parental Strain		JE2		1.54	0.3958			N/A
SAUSA300_1781	NWMN_1723	NE64	hemY	1.425	0.1458	ns	0.9998	protoporphyrinogen oxidase
SAUSA300_0671	NWMN_0654	NE364		1.651	0.7211	ns	0.9998	ABC transporter, ATP-binding protein, MsbA family
SAUSA300_1505	NWMN_1449	NE377	GloB	10.57	3.222	****	<0.0001	hydroxyacylglutathione hydrolase
SAUSA300_1708	NWMN_1655	NE386	rot	1.398	0.1499	ns	0.9997	staphylococcal accessory regulator Rot
SAUSA300_2564	NWMN_2528	NE503	estA, FrmB	6.28	2.251	****	<0.0001	tributyrin esterase
SAUSA300_1452	NWMN_1410	NE520	proC	1.468	0.7491	ns	0.9999	pyrroline-5-carboxylate reductase
SAUSA300_0201	NWMN_0144	NE541		1.598	0.518	ns	>0.9999	peptide ABC transporter, permease protein
SAUSA300_1085	NWMN_1101	NE874		1.641	0.5706	ns	0.9998	conserved hypothetical protein
SAUSA300_2105	NWMN_2057	NE929	mtlF	1.7	0.5543	ns	0.9997	PTS system, mannitol specific IIBC component
SAUSA300_0778	NWMN_0762	NE1051		1.464	0.2537	ns	0.9999	Hypothetical protein
SAUSA300_1290	NWMN_1308	NE1118	dapD	1.69	0.5911	ns	0.9997	tetrahydrodipicolinate acetyltransferase
SAUSA300_0414	NWMN_0407	NE1127	lpl4	1.723	0.6196	ns	0.9997	tandem lipoprotein
SAUSA300_0028		NE1283	tnp	2.099	0.3634	ns	0.9986	Putative Transposase

## Sheet: Figure 4 source data 4
Accession numbers used for the isolates in WhatsGNU analysis.
Isolate	Bioproject	Biosample	WGS	SRA
AD_3_179	PRJNA512846	SAMN10689346	VYMI00000000	SRR8389007
AD_11_548	PRJNA512846	SAMN10689354	VYMN00000000	SRR8389002
AD_14_565	PRJNA512846	SAMN10689355	VYMO00000000	SRR8389003
AD_16_660	PRJNA512846	SAMN10689358	SJAX00000000	SRR8389044
AD_61_868	PRJNA512846	SAMN10689401	VYNS00000000	SRR11016776
AD_85_830	PRJNA512846	SAMN10689428	VYOK00000000	SRR8389056
AD_96_471	PRJNA512846	SAMN10689447	VYOW00000000	SRR8389016
AD_103_347	PRJNA512846	SAMN10689453	VYPC00000000	SRR8389035
AD_113_782	PRJNA512846	SAMN10689463	VYPL00000000	SRR8389099
SSTI_227_44	PRJNA563582	SAMN12642230	VUGB00000000	SRR11016228
SSTI_228_42	PRJNA563582	SAMN12642226	VUGF00000000	SRR11016232
SSTI_231_2	PRJNA563582	SAMN12642218	VUGN00000000	SRR11016241
SSTI_233_51	PRJNA563582	SAMN12642215	VUGQ00000000	SRR11016244
SSTI_235	PRJNA563582	SAMN12642210	VUGV00000000	SRR11016250
SSTI_241_9	PRJNA563582	SAMN12642203	VUHC00000000	SRR11016198
SSTI_247_75	PRJNA563582	SAMN12642193	VUHM00000000	SRR11016209
SSTI_258_57	PRJNA563582	SAMN12642177	VUIB00000000	SRR11016226
SSTI_290	PRJNA563582	SAMN12642174	VUIE00000000	SRR11016283
